# Supplementary material for: The high-affinity metal Transporters NRAMP1 and IRT1 Team up to Take up Iron under Sufficient Metal Provision
Source: PubMed Central journal article supplement (PMC5110964; doi:10.1038/srep37222), 2016-11-16
Supplement: srep37222-s1.pdf [file srep37222-s1.pdf]

## Online Supplementary Information

The high-affinity metal Transporters NRAMP1 and IRT1 Team  
up to Take up Iron under Sufficient Metal Provision

Loren Castaings<sup>1</sup>, Antoine Caquot<sup>1</sup>, Stéphanie Loubet<sup>1</sup> and Catherine  
Curie<sup>1\*</sup>

## Supplementary Methods

### GUS staining

Seeds from the previously described *pNRAMP1::GUS*<sup>25</sup> line were first surface-sterilized, sown on half-strength Murashige and Skoog medium ( $\frac{1}{2}$ MS, standard conditions) containing 0.8 % agar, 1 % sucrose, 0.5 g.L<sup>-1</sup> MES (pH 5.7 with KOH) then stratified two days at 4°C in the dark and finally horizontally grown for 15 days under long days (16h days:8h night) at 21°C. Seedlings were harvested, immersed in the staining solution [1 mg.ml<sup>-1</sup> X-Gluc (5-bromo-4-chloro-3-indolyl- $\beta$ -D-glucuronide), 2 mM potassium ferrocyanide, 2 mM potassium ferricyanide dissolved in phosphate buffer (50 mM Na<sub>2</sub>HPO<sub>4</sub>, 50 mM NaH<sub>2</sub>PO<sub>4</sub>, pH7) 0.1 % Triton X-100] and vacuumed twice 5 min to allow the solution to penetrate the tissues. Coloration was allowed to develop overnight at 37°C. The staining solution was replaced by ethanol 70 % until leaf chlorophyll removal was complete. Seedlings were then rinsed in water and observed under an optical microscope.

## Supplementary Tables and Figures

### Supplementary Table S1: Elemental analyses in shoots and roots.

Fe, Mn, Zn and Cu content in roots and shoots of 4 week-old plants grown in hydroponic conditions in standard medium. Mean  $\pm$  sd. (n=3 to 4 replicates of 8 to 10 plants each).

|                                   | Fe                          |                                 | Mn                           |                             | Zn                   |                      | Cu                 |                    |
|-----------------------------------|-----------------------------|---------------------------------|------------------------------|-----------------------------|----------------------|----------------------|--------------------|--------------------|
|                                   | Shoots                      | Roots                           | Shoots                       | Roots                       | Shoots               | Roots                | Shoots             | Roots              |
| <b>WT</b>                         | 89.40<br>$\pm$ 13.6         | 570<br>$\pm$ 37.12              | 879.04<br>$\pm$ 70.27        | 121.97<br>$\pm$ 30.61       | 44.55<br>$\pm$ 10.66 | 50.67<br>$\pm$ 19.86 | 5.05<br>$\pm$ 1.48 | 8.56<br>$\pm$ 1.74 |
| <b><i>nramp1-1</i></b>            | 100.16<br>$\pm$ 6.05        | 538.16<br>$\pm$ 26.37           | 879.39<br>$\pm$ 88.45        | 154.17<br>$\pm$ 52.75       | 30.58<br>$\pm$ 2.51  | 32.24<br>$\pm$ 6.86  | 3.08<br>$\pm$ 0.3  | 5.46<br>$\pm$ 0.49 |
| <b><i>irt1-1</i></b>              | 97.85<br>$\pm$ 11.35        | 658.65<br>$\pm$ 33.80           | 817.14<br>$\pm$ 25.43        | 203.95<br>$\pm$ 37.70       | 34.76<br>$\pm$ 7.38  | 34.27<br>$\pm$ 7.86  | 3.58<br>$\pm$ 0.49 | 6.64<br>$\pm$ 1.04 |
| <b><i>nramp1-1<br/>irt1-1</i></b> | <b>45.40</b><br>$\pm$ 13.37 | <b>1,883.03</b><br>$\pm$ 111.07 | <b>545.99</b><br>$\pm$ 40.66 | <b>58.36</b><br>$\pm$ 10.24 | 46.15<br>$\pm$ 6.17  | 82.44<br>$\pm$ 11.92 | 4.83<br>$\pm$ 0.92 | 8.27<br>$\pm$ 1.89 |

**Supplementary Table S2: Primers list.**

|                         | Forward                          | Reverse                               |
|-------------------------|----------------------------------|---------------------------------------|
| <b>qPCR primers</b>     |                                  |                                       |
| <i>ACTIN</i>            | GGTAACATTGTGCTCAGTGGTGG          | AACGACCTTAATCTTCATGCTGC               |
| <i>NRAMP1</i>           | CGGAACTTATGCTGGACAAT             | AGAAGAGGAACCAACGCAAA                  |
| <i>IRT1</i>             | CGGTTGGACTTCTAAATGC              | CGATAATCGACATTCCACCG                  |
| <i>FRO2</i>             | GCGACTTGTAGTGCGGCTATG            | CGTTGCACGAGCGATTCTTG                  |
| <i>FER1</i>             | TCGTTGAGAGTGAATTTCTGG            | ACCCCAACATTGGTCATCTG                  |
| <b>Genotyping</b>       |                                  |                                       |
| <i>nramp1-1</i>         | GCGTGGACCGCTTGCTGCAACT(LB1b)     | GTCAACATCGGAGGTAGATACTCTACATGGTAACTGC |
|                         | GCGGGGCTGTTTGAATGCC              | GTCAACATCGGAGGTAGATACTCTACATGGTAACTGC |
| <i>nramp1-2</i>         | CTACAAATTGCCTTTTCTTATCGAC (Tag5) | CGATGGCGGCTACAGGATCTGGACG             |
|                         | GCTGCTACAGGATCTGGACGTTCTCAATTC   | GTCAACATCGGAGGTAGATACTCTACATGGTAACTGC |
| <i>irt1-1</i>           | GTTAAGCCCATTTGGCGATAATCGACATTC   | CTACAAATTGCCTTTTCTTATCGAC             |
|                         | CACACAAACATTAACAATC              | GAAAAAGCAGCAAAAGTTTTATTTA             |
| <b>Cloning</b>          |                                  |                                       |
| <i>pNRAMP1</i>          | GGGCACGGTACCAATCATGTCTTAAGCTTC   | GGGCACGAATTCGCCGTCTCTCTTCCTA          |
| <i>IRT1 full-length</i> | GGGCACGAATTCACACAAACATTAACAATC   | GGGCACCTGCAGGAAAAAGCAGCAAAAGTTTTATTTA |

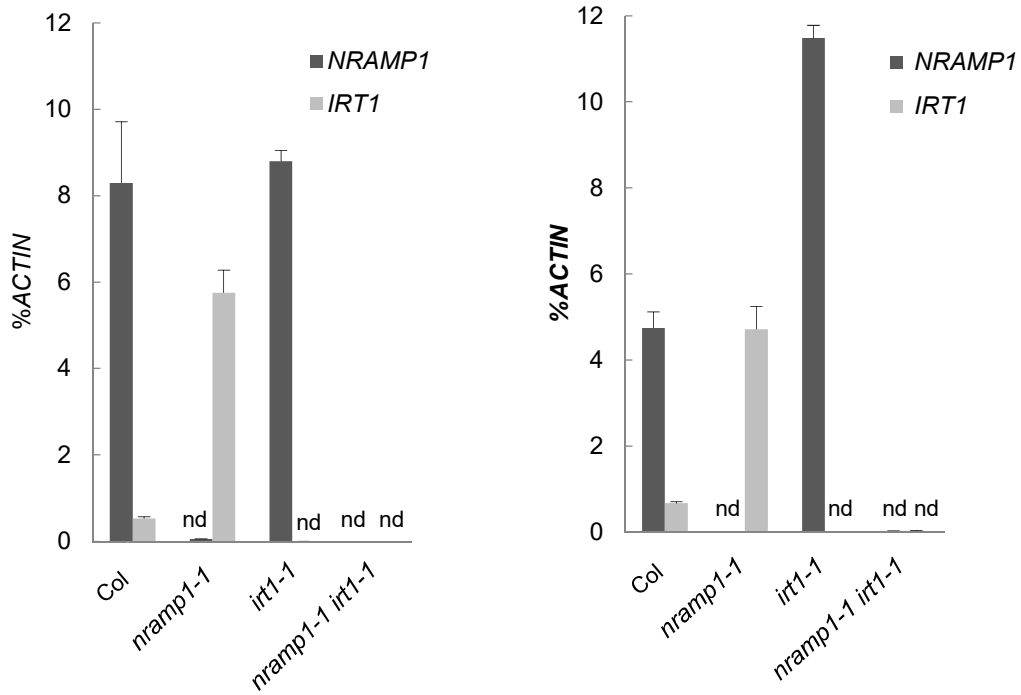

**Supplementary Figure S1: Expression analysis of *IRT1* and *NRAMP1* genes in roots.** RT-qPCR was performed on root RNA from wild-type, *nramp1-1*, *irt1-1* and *nramp1-1 irt1-1* plants grown in hydroponics for 4 weeks under standard conditions (25  $\mu$ M Fe, 20  $\mu$ M Mn). Two independent experiments are shown (left and right). Transcripts levels are expressed relative to those of the reference gene *ACTIN*  $\pm$  sd. (n= 3 technical replicates). nd, non-detectable.

a

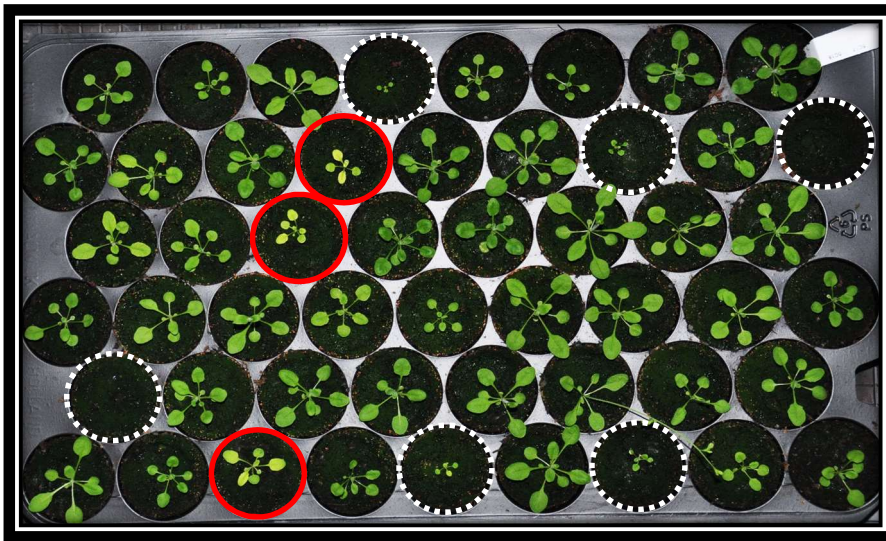

b

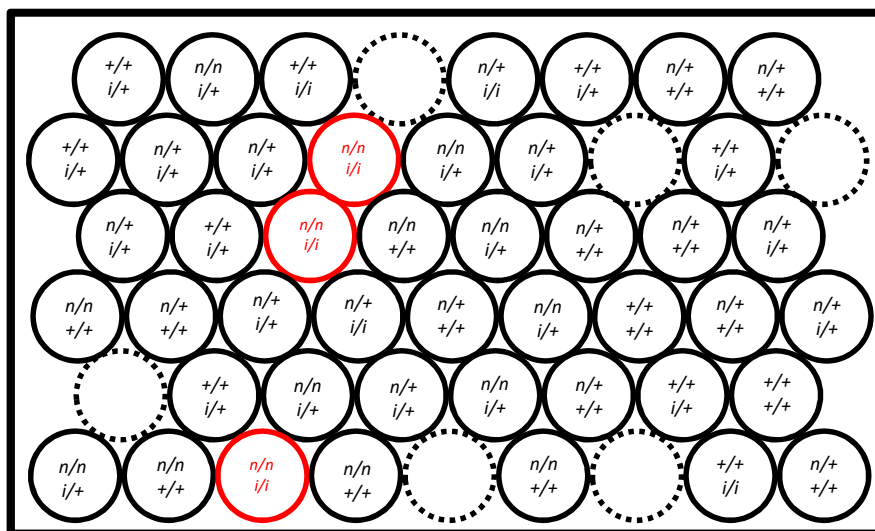

**Supplementary Figure S2: Phenotyping and genotyping of the F2 progeny of a cross between *nramp1-1* and *irt1-1*.**

Plants were supplied with Fe through irrigation with 500 mg/L Fe-EDDHA as well as spraying of the leaves every other day with 200  $\mu$ M Fe-citrate. **(a)** picture of the plants 20 days after sowing. Three out of 45 F2 progeny plants, *i.e.* the expected 1 to 16 segregation ratio for two independent loci, showed slow growth and a strong chlorosis (circled in red) and were the only ones of this population to be genotyped as being homozygous for both *nramp1-1* and *irt1-1* mutations. **(b)** genotyping results of the plants shown in (a). Dashed circles indicated dead seedlings or seedling excluded from genotyping because of a delay in germination. Wild type allele (+), *irt1-1* mutant allele (*i*) and *nramp1-1* mutant allele (*n*).

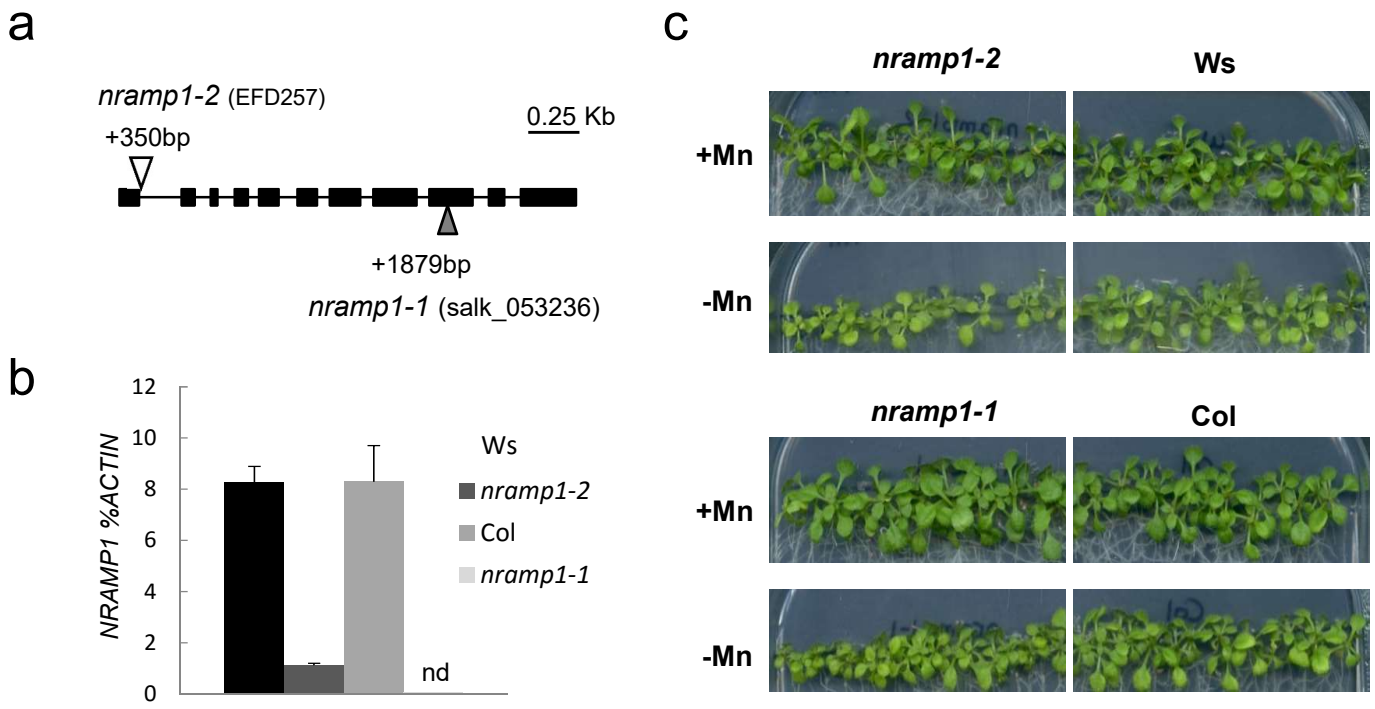

**Supplementary Figure S3: The *nramp1-2* knock-down allele is hypersensitive to Mn deficiency.** (a) Position of T-DNA insertions in the *NRAMP1* gene for the *nramp1-1* (grey triangle) and *nramp1-2* (white triangle) alleles. (b) *NRAMP1* expression in roots of *nramp1-1* and *nramp1-2* mutants compared to their respective wild type parent. Plants were grown 4 weeks in hydroponic standard conditions (25  $\mu$ M Fe, 20  $\mu$ M Mn). Transcripts levels were measured by qRT-PCR relative to those of the reference gene *ACTIN*  $\pm$  sd. (n= 3 technical replicates). nd, non-detectable. (c) Shoot growth phenotype of 14 day-old *nramp1* mutants grown *in vitro* with (+Mn) or without Mn (-Mn) in the medium as compared to their respective wild-type parent.

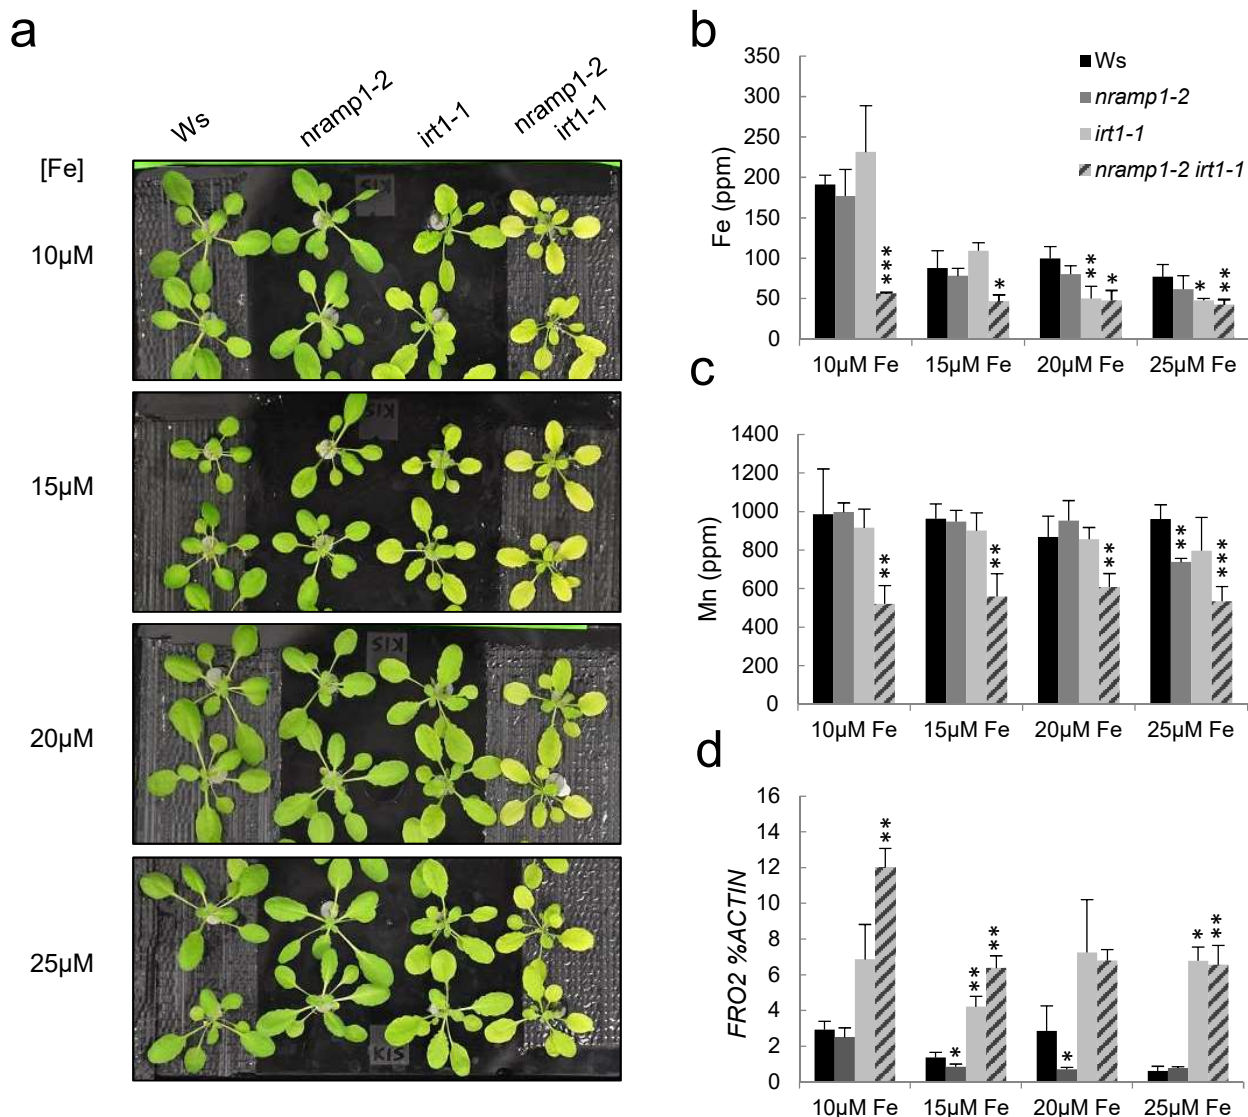

**Supplementary Figure S4: The second allele *nramp1-2 irt1-1* is also hypersensitive to Fe limitation.** (a) 28 day-old plants grown in hydroponic medium containing a range of Fe-EDTA concentrations. (b) and (c) MP-AES measurement of Fe (b) and Mn (c) content in shoots of the plants shown in (a). Means  $\pm$  sd. (n = 2 to 3 replicates of 3 plants each). (d) *FRO2* expression in roots of the plants shown in (a). Transcripts levels were measured by qRT-PCR relative to those of the reference gene *ACTIN*  $\pm$  sd. (n = 2 to 3 replicates of 3 plants each). Panels (b), (c) and (d) share the colour-code legend. Asterisks indicate values statistically different from the Ws wild-type plants grown at the same Fe concentration (Student T-test, \* P-value <0.1, \*\*P-value <0.05, \*\*\*P-value < 0.005).



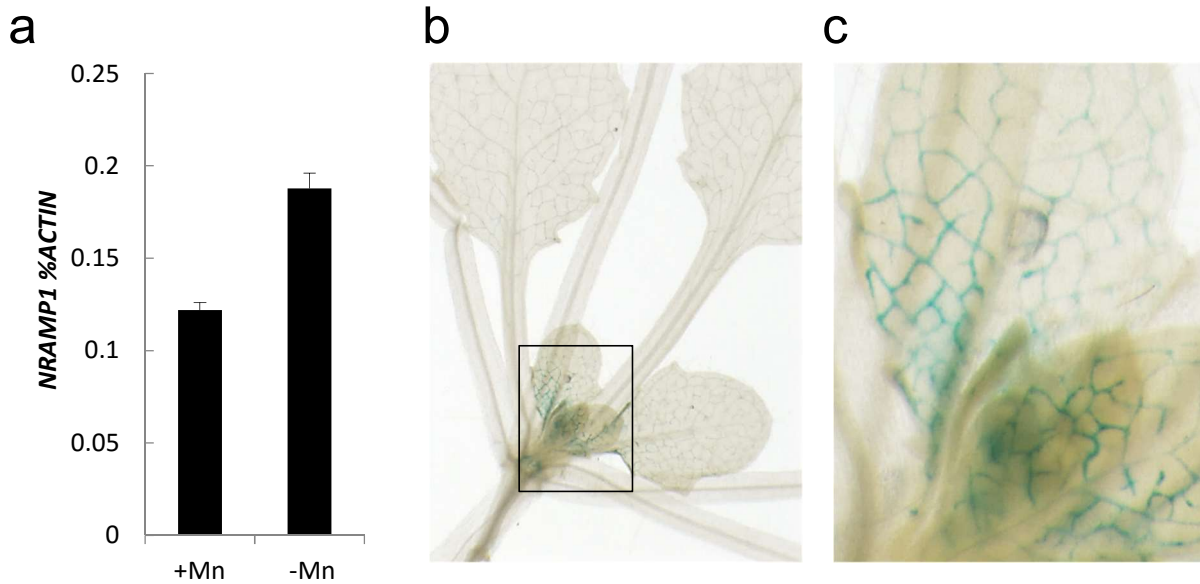

**Supplementary Figure S5: *NRAMP1* expression in shoots.** (a) *NRAMP1* expression in shoots of 15 day-old seedlings vertically grown *in vitro* in standard conditions (+Mn) or in the absence (-Mn) of Mn in the medium. Transcripts levels were measured by qRT-PCR relative to those of the reference gene *ACTIN*  $\pm$  sd. (n=3 replicates of 8 plants each). (b) GUS staining of a 15 day-old *pNRAMP1::GUS* transgenic line grown *in vitro* in standard conditions. (c) Magnification of the young leaves shown in (b).

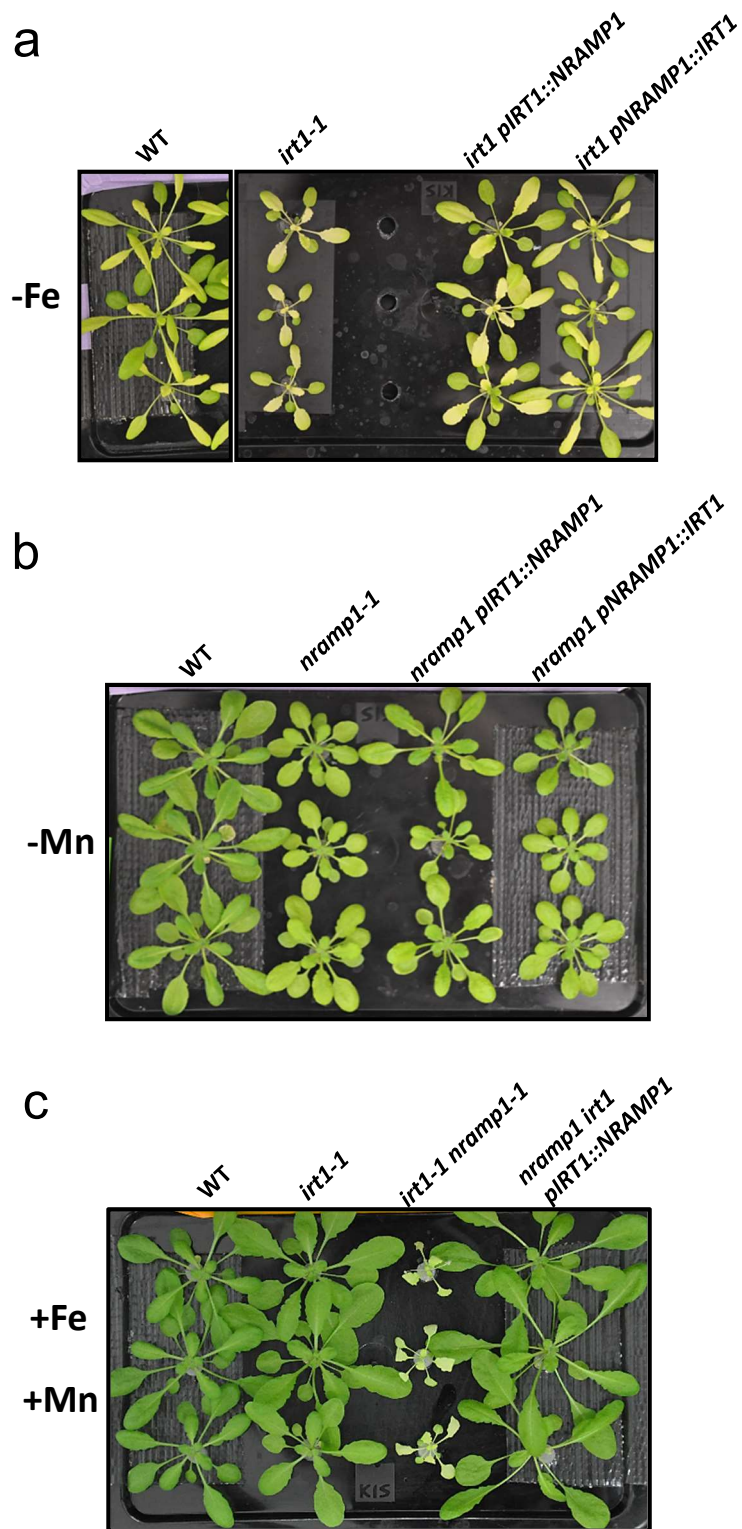

**Supplementary Figure S6: Phenotypic complementation of *nramp1-1*, *irt1-1* and *nramp1-1 irt1-1* mutants by promoter swap constructs. (a) Complementation of *irt1-1* hypersensitivity to iron deficiency by promoter swap constructs. Plants were grown 2 weeks in standard hydroponic conditions and one additional week without added iron (-Fe). (b) Complementation of *nramp1-1* hypersensitivity to manganese deficiency by promoter swap constructs. Plants were grown for 3 weeks in hydroponic conditions without added manganese (-Mn). (c) Complementation of *nramp1-1 irt1-1* growth defect and chlorosis by *pIRT1::NRAMP1*. Plants were grown for 3 weeks in hydroponic standard conditions (+Fe +Mn).**

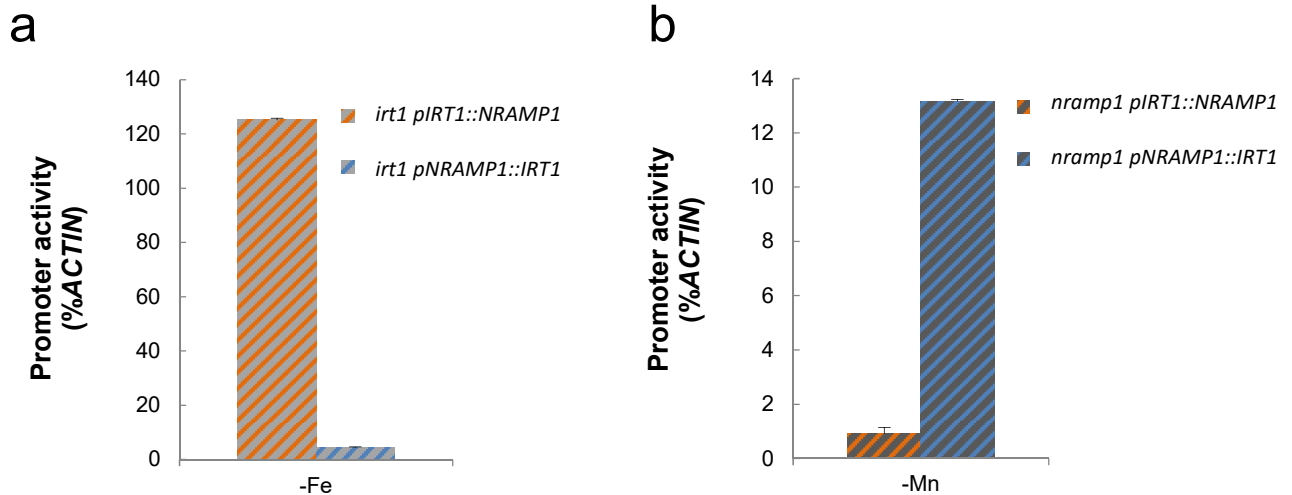

**Supplementary Figure S7: Activity of the IRT1 and NRAMP1 promoters in the promoter swap lines.** Expression level of *IRT1* and *NRAMP1* produced by the promoter-swap constructs *pNRAMP1::IRT1* and *pIRT1::NRAMP1*, respectively, in roots of the *irt1* (**a**) or the *nramp1* (**b**) mutant. Plants were (a) grown 2 weeks hydroponically under standard condition, then Fe-starved for one additional week (-Fe) or (b) grown for 3 weeks under Mn starvation (-Mn). Transcripts levels were measured by qRT-PCR relative to those of the reference gene *ACTIN*  $\pm$  sd. (n=3 biological replicates of 3 to 6 individuals).
